# Supplementary material for: Reactive symbol sequences for a model of hydrogen combustion
Source: Royal Society of Chemistry journal article supplement (doi:10.1039/c5cp05125h), 2015-11-26
Supplement: c5cp05125h1.pdf [file c5cp05125h1.pdf]

## Supporting Information for Reactive symbol sequences for a model of hydrogen combustion

Mohammad Alaghemandi<sup>1</sup> and Jason R. Green<sup>1,2,\*</sup>

<sup>1</sup>Department of Chemistry, University of Massachusetts Boston, Boston, MA 02125, USA

<sup>2</sup>Department of Physics, University of Massachusetts Boston, Boston, MA 02125, USA

mohammad.alaghemandi@umb.edu

\*jason.green@umb.edu

### SI1. STUDIED TEMPERATURES AND DENSITIES

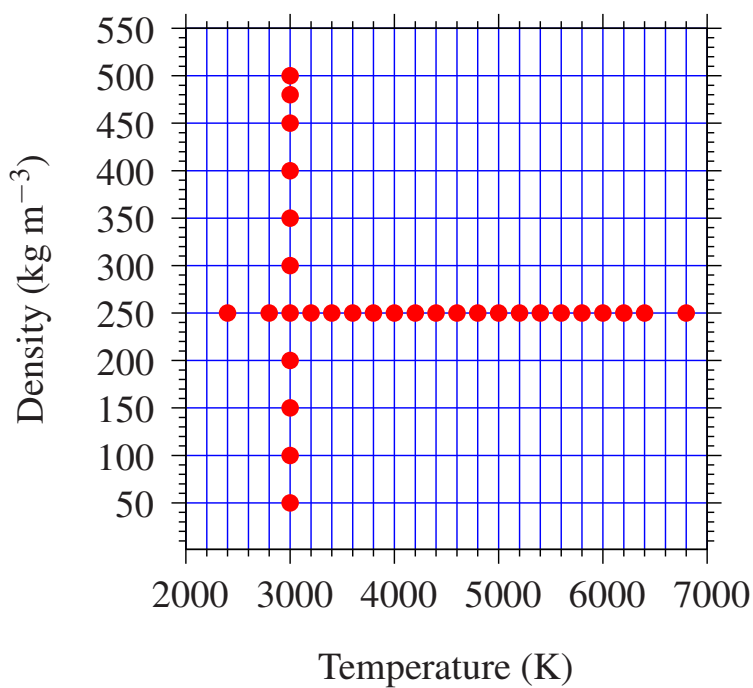

Figure 1: Studied temperatures and densities in this work.

## SI2. TIME EVOLUTION OF CHEMICAL SPECIES

Figure 2 shows the time evolution of  $\text{H}_2\text{O}$  at two different temperatures of 3000 and 6000 K and a density of  $250 \text{ kg m}^{-3}$ . Increasing the temperature reduces the time to reach the maximum number of water molecules at each temperature.

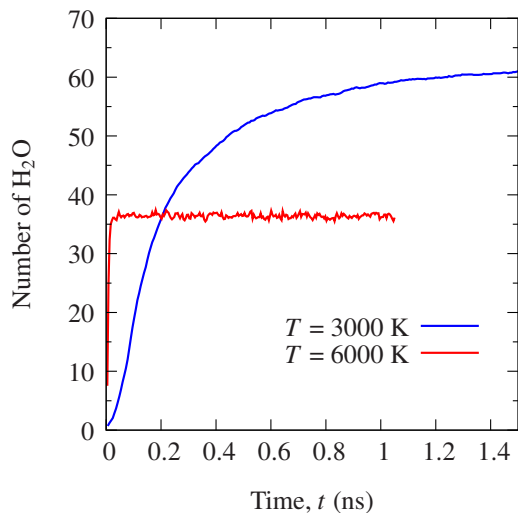

Figure 2: Time evolution of  $\text{H}_2\text{O}$  number at 3000 and 6000 K and a density of  $250 \text{ kg m}^{-3}$ . Doubling the  $T$  accelerates the time to “complete” the reaction, but also causes  $\text{H}_2\text{O}$  dissociation which decreases the net  $\text{H}_2\text{O}$  production.

The number of intermediate species at high temperatures are larger than at lower temperatures. Although all of  $\text{H}_2$  and  $\text{O}_2$  molecules are quickly converted to water at 6000 K, water molecules readily dissociate back to radical species. The high kinetic energy at 6000 K provides enough energy to support the existence of energetic species which are less stable at lower temperatures; see Figure 3.

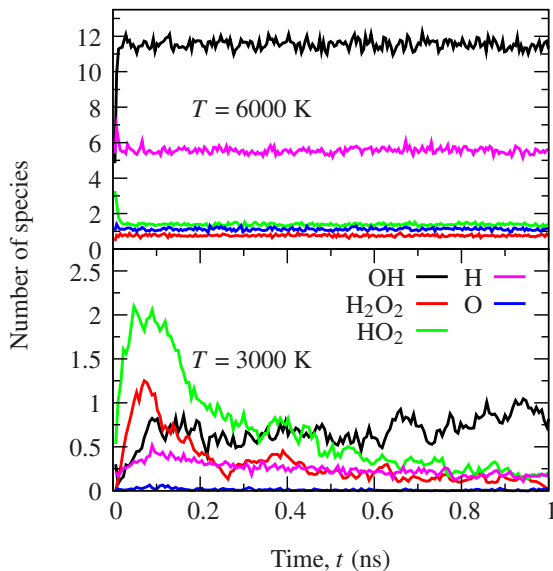

Figure 3: Time evolution of average number of intermediate species at 3000 (bottom) and 6000 K (top) and a density of  $250 \text{ kg m}^{-3}$ .

### SI3. HYDROGEN AND OXYGEN SEQUENCES

Number of steps in the trajectory of reactants to products is the length,  $L$ , of any sequence. The temperature dependence of the chain length probability,  $P(L)$ , is plotted in Figure 4 and 5 for hydrogen and oxygen sequences, respectively, for samples with density of  $250 \text{ kg m}^{-3}$ . The chain length probabilities versus  $L$  at 3000 K and different densities are depicted in Figure 6 and 7 for hydrogen and oxygen sequences, respectively.

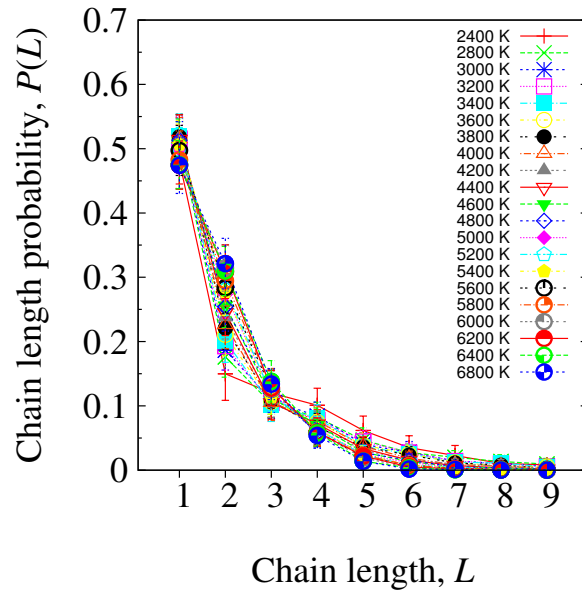

Figure 4: Chain length probability,  $P(L)$ , of hydrogen at a range of temperature from 2400 to 6800 K with density of  $250 \text{ kg m}^{-3}$ .

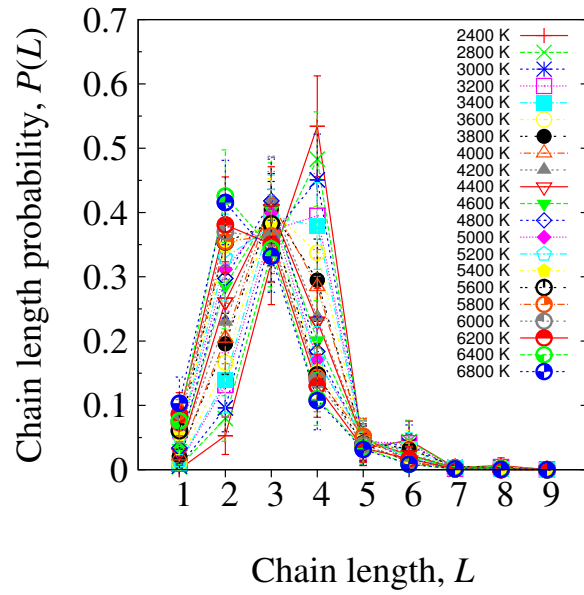

Figure 5: Chain length probability,  $P(L)$ , of oxygen at a range of temperature from 2400 to 6800 K with density of  $250 \text{ kg m}^{-3}$ .

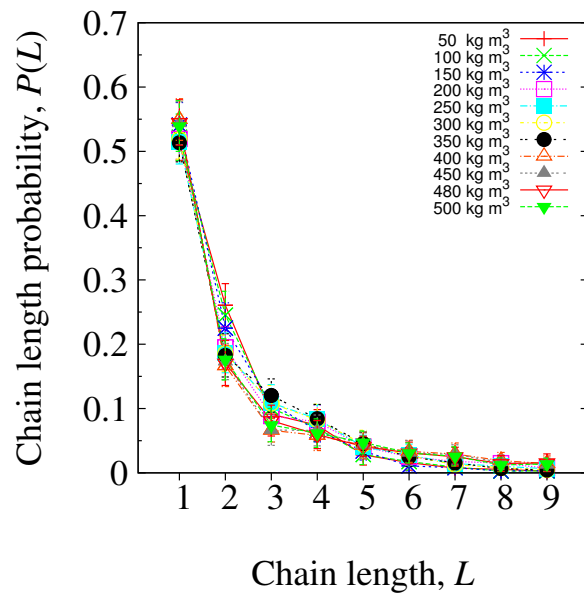

Figure 6: Chain length probability,  $P(L)$ , of hydrogen at 3000 K with density from  $50$  to  $500 \text{ kg m}^{-3}$ .

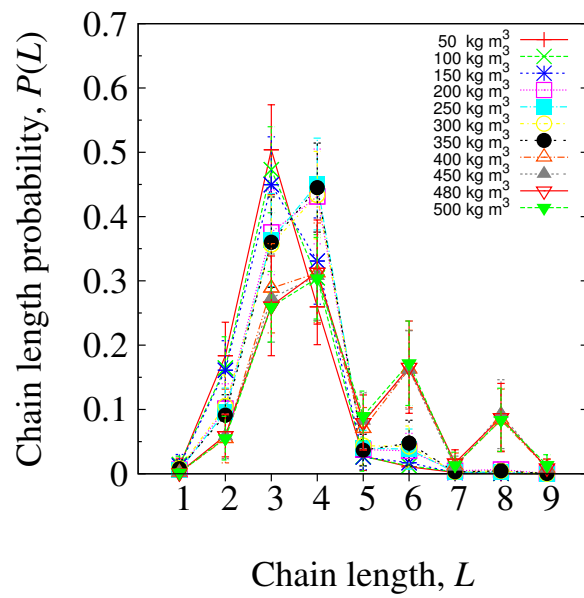

Figure 7: Chain length probability,  $P(L)$ , of oxygen at 3000 K with density from 50 to 500  $\text{kg m}^{-3}$ .

SI4. Elementary reactions at  $T=3000$  K and  $\rho=250$  kg m<sup>-3</sup>

|     | elementary reaction                                                                 | probability |
|-----|-------------------------------------------------------------------------------------|-------------|
| R1  | $\text{H}_2 + \text{OH} \rightarrow \text{H} + \text{H}_2\text{O}$                  | 0.2645      |
| R2  | $\text{H} + \text{O}_2 \rightarrow \text{HO}_2$                                     | 0.1935      |
| R3  | $\text{H}_2\text{O}_2 \rightarrow 2\text{OH}$                                       | 0.0838      |
| R4  | $\text{H} + \text{HO}_2 \rightarrow \text{H}_2\text{O}_2$                           | 0.0774      |
| R5  | $\text{H}_2 + \text{HO}_2 \rightarrow \text{H} + \text{H}_2\text{O}_2$              | 0.0516      |
| R6  | $\text{H} + \text{OH} \rightarrow \text{H}_2\text{O}$                               | 0.0451      |
| R7  | $\text{H}_2\text{O}_2 + \text{H} \rightarrow \text{OH} + \text{H}_2\text{O}$        | 0.0387      |
| R8  | $\text{HO}_2 + \text{OH} \rightarrow \text{O}_2 + \text{H}_2\text{O}$               | 0.0258      |
| R9  | $\text{H}_2 + \text{HO}_2 \rightarrow \text{OH} + \text{H}_2\text{O}$               | 0.0258      |
| R10 | $\text{HO}_2 \rightarrow \text{O} + \text{OH}$                                      | 0.0193      |
| R11 | $\text{H}_2 + \text{O}_2 \rightarrow \text{H} + \text{HO}_2$                        | 0.0193      |
| R12 | $2\text{HO}_2 + \text{OH} \rightarrow \text{O}_2 + \text{H} + \text{H}_2\text{O}_2$ | 0.0193      |
| R13 | $\text{O} + \text{OH} \rightarrow \text{HO}_2$                                      | 0.0129      |
| R14 | $\text{H} + \text{HO}_2 \rightarrow 2\text{OH}$                                     | 0.0129      |
| R15 | $\text{H} + \text{H}_2\text{O}_2 \rightarrow \text{OH} + \text{H}_2\text{O}$        | 0.0129      |
| R16 | $\text{H}_2\text{O}_2 + \text{OH} \rightarrow \text{HO}_2 + \text{H}_2\text{O}$     | 0.0129      |
| R17 | $2\text{OH} \rightarrow \text{H}_2\text{O}_2$                                       | 0.0129      |
| R18 | $\text{O}_2 + \text{OH} \rightarrow \text{O} + \text{HO}_2$                         | 0.0064      |
| R19 | $\text{O}_2 + \text{H} \rightarrow \text{O} + \text{OH}$                            | 0.0064      |
| R20 | $\text{HO}_2 + \text{H} \rightarrow 2\text{OH}$                                     | 0.0064      |
| R21 | $\text{H} + \text{HO}_2 \rightarrow \text{H}_2 + \text{O}_2$                        | 0.0064      |
| R22 | $\text{H}_2 + \text{O} \rightarrow \text{H} + \text{OH}$                            | 0.0064      |
| R23 | $\text{H}_2\text{O}_2 \rightarrow \text{O} + \text{H}_2\text{O}$                    | 0.0064      |
| R24 | $\text{H}_2 + \text{O}_2 \rightarrow \text{O} + \text{H}_2\text{O}$                 | 0.0064      |
| R25 | $\text{H}_2\text{O}_2 \rightarrow \text{H} + \text{HO}_2$                           | 0.0064      |
| R26 | $\text{H}_2\text{O}_2 \rightarrow \text{H}_2 + \text{O}_2$                          | 0.0064      |
| R27 | $\text{H}_2 + 2\text{O}_2 \rightarrow 2\text{HO}_2$                                 | 0.0064      |
| R28 | $2\text{HO}_2 \rightarrow \text{O}_2 + \text{H}_2\text{O}_2$                        | 0.0064      |

**SI5. Elementary reactions at  $T=6000$  K and  $\rho=250$  kg m<sup>-3</sup>**

|     | elementary reaction                                                                       | probability |
|-----|-------------------------------------------------------------------------------------------|-------------|
| R1  | $\text{H}_2 + \text{OH} \rightarrow \text{H} + \text{H}_2\text{O}$                        | 0.2272      |
| R2  | $\text{H} + \text{O}_2 \rightarrow \text{HO}_2$                                           | 0.1439      |
| R3  | $\text{H} + \text{OH} \rightarrow \text{H}_2\text{O}$                                     | 0.1439      |
| R4  | $\text{O}_2 + \text{H} \rightarrow \text{O} + \text{OH}$                                  | 0.0530      |
| R5  | $\text{H}_2 + \text{O} \rightarrow \text{H} + \text{OH}$                                  | 0.0530      |
| R6  | $\text{HO}_2 \rightarrow \text{O} + \text{OH}$                                            | 0.0454      |
| R7  | $\text{H}_2 + \text{O} \rightarrow \text{H}_2\text{O}$                                    | 0.0378      |
| R8  | $\text{H}_2\text{O}_2 \rightarrow 2\text{OH}$                                             | 0.0303      |
| R9  | $\text{H}_2 + \text{O}_2 \rightarrow 2\text{OH}$                                          | 0.0303      |
| R10 | $\text{H}_2 + \text{HO}_2 \rightarrow 2\text{OH} + \text{H}$                              | 0.0303      |
| R11 | $\text{O}_2 + \text{OH} \rightarrow \text{O} + \text{HO}_2$                               | 0.0227      |
| R12 | $\text{H} + \text{HO}_2 \rightarrow \text{H}_2\text{O}_2$                                 | 0.0227      |
| R13 | $\text{H}_2 + \text{HO}_2 \rightarrow \text{OH} + \text{H}_2\text{O}$                     | 0.0227      |
| R14 | $\text{OH} \rightarrow \text{H} + \text{O}$                                               | 0.0151      |
| R15 | $\text{H}_2 + \text{O}_2 \rightarrow \text{O} + \text{H}_2\text{O}$                       | 0.0151      |
| R16 | $\text{H}_2 + \text{HO}_2 \rightarrow \text{H} + \text{H}_2\text{O}_2$                    | 0.0151      |
| R17 | $\text{O} + \text{OH} \rightarrow \text{HO}_2$                                            | 0.0075      |
| R18 | $\text{O}_2 + \text{OH} \rightarrow \text{O}_2 + \text{O} + \text{H}$                     | 0.0075      |
| R19 | $\text{HO}_2 + \text{OH} \rightarrow 2\text{O} + \text{H}_2\text{O}$                      | 0.0075      |
| R20 | $\text{HO}_2 + \text{H} \rightarrow 2\text{OH}$                                           | 0.0075      |
| R21 | $\text{H} + \text{HO}_2 \rightarrow 2\text{OH}$                                           | 0.0075      |
| R22 | $\text{H}_2 + \text{O} \rightarrow \text{H} + \text{OH}$                                  | 0.0075      |
| R23 | $\text{H}_2 + \text{O}_2 \rightarrow \text{OH} + \text{H} + \text{O}$                     | 0.0075      |
| R24 | $\text{H}_2\text{O}_2 \rightarrow \text{O} + \text{H}_2\text{O}$                          | 0.0075      |
| R25 | $\text{H}_2 + \text{O}_2 \rightarrow \text{H}_2\text{O}_2$                                | 0.0075      |
| R26 | $\text{H}_2 + \text{H}_2\text{O}_2 \rightarrow \text{OH} + \text{H} + \text{H}_2\text{O}$ | 0.0075      |
| R27 | $2\text{OH} \rightarrow \text{H}_2\text{O}_2$                                             | 0.0075      |
| R28 | $2\text{H} \rightarrow \text{H}_2$                                                        | 0.0075      |

## SI6. TIME DEPENDENCE OF HYDROGEN AND OXYGEN SEQUENCES

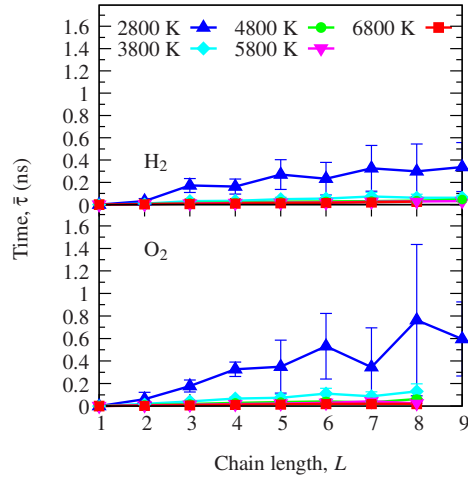

Figure 8: Average time,  $\bar{\tau}$ , to complete a sequence for hydrogen (top) and oxygen (bottom) at a range of temperature from 2800 to 6800 K and  $250 \text{ kg m}^{-3}$ .

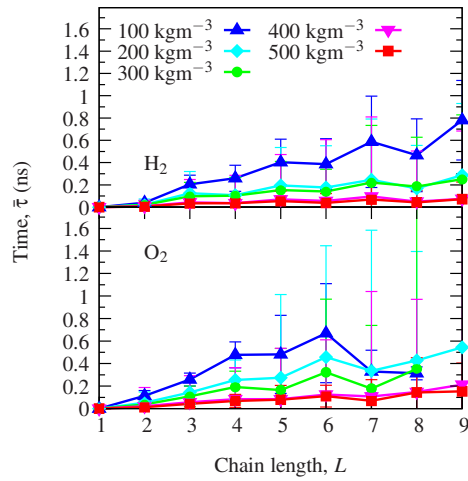

Figure 9: Average time,  $\bar{\tau}$ , to complete a sequence for hydrogen (top) and oxygen (bottom) at 3000 K and densities from 50 to  $500 \text{ kg m}^{-3}$ .
